# Supplementary material
Source: HighWire-hosted journal article supplement (https://bjgp.org/highwire/filestream/41230/field_highwire_adjunct_files/0/bjgp20X714137_suppl.pdf)
Supplement: bjgp20X714137_suppl.pdf [file bjgp20X714137_suppl.pdf]

**Supplementary Table S1: Crude Rates of Prostate Cancer per 10,000 person years on QResearch. n/a indicates fewer than 5 cases where counts have been suppressed**

| Age Band at cohort entry | QResearch Derivation Cohort |                               | QResearch Validation Cohort |                               |
|--------------------------|-----------------------------|-------------------------------|-----------------------------|-------------------------------|
|                          | Cases                       | Incidence Rate                | Cases                       | Incidence Rate                |
| <b>total</b>             | <b>40,821</b>               | <b>84.86 (84.04 to 85.68)</b> | <b>14,033</b>               | <b>85.07 (83.67 to 86.49)</b> |
| 25-29 years              | 14                          | 3.66 (2.17 to 6.18)           | n/a                         | 0.76 (0.11 to 5.42)           |
| 30-34 years              | 78                          | 7.29 (5.84 to 9.10)           | 23                          | 6.50 (4.32 to 9.79)           |
| 35-39 years              | 393                         | 17.28 (15.65 to 19.07)        | 107                         | 14.16 (11.71 to 17.11)        |
| 40-44 years              | 1158                        | 31.10 (29.36 to 32.95)        | 366                         | 29.32 (26.46 to 32.48)        |
| 45-49 years              | 2506                        | 48.33 (46.47 to 50.26)        | 859                         | 48.44 (45.30 to 51.79)        |
| 50-54 years              | 5111                        | 73.43 (71.45 to 75.47)        | 1643                        | 68.26 (65.04 to 71.64)        |
| 55-59 years              | 6453                        | 91.76 (89.55 to 94.03)        | 2269                        | 93.71 (89.93 to 97.64)        |
| 60-64 years              | 7596                        | 110.29 (107.84 to 112.80)     | 2647                        | 112.07 (107.88 to 116.42)     |
| 65-69 years              | 7239                        | 118.68 (115.98 to 121.44)     | 2453                        | 117.33 (112.78 to 122.07)     |
| 70-74 years              | 5335                        | 122.15 (118.92 to 125.47)     | 1910                        | 125.72 (120.20 to 131.48)     |
| 75-79 years              | 3445                        | 125.39 (121.27 to 129.64)     | 1211                        | 128.66 (121.61 to 136.11)     |
| 80-84 years              | 1493                        | 108.56 (103.19 to 114.21)     | 544                         | 110.57 (101.66 to 120.27)     |
|                          |                             |                               |                             |                               |

### Supplementary Figure S1

Supplementary figures 1a-e show graphs of the adjusted hazard ratios for the fractional polynomial terms for age, body mass index, and PSA as well as interaction terms. Increasing deprivation was associated with a decreased risk of prostate cancer. A positive family history of prostate cancer was associated with a decreased risk of prostate cancer. A positive family history of prostate cancer was associated with an 83% (95% CI 66 to 102%) increased risk of prostate cancer at the mean age. Black Caribbean ethnicity was associated with a 56% (95% CI 46% to 67%) increased risk of prostate cancer and Black African ethnicity with a 14% (95% CI 4% to 26%) increased risk compared with the white/not recorded ethnic group. Chinese, Indian, Pakistani, Bangladeshi and the other Asian ethnic groups all had significantly lower risks of prostate cancer than the white/not recorded group.

### Supplementary Figure S1a Hazard ratios for the final model by age

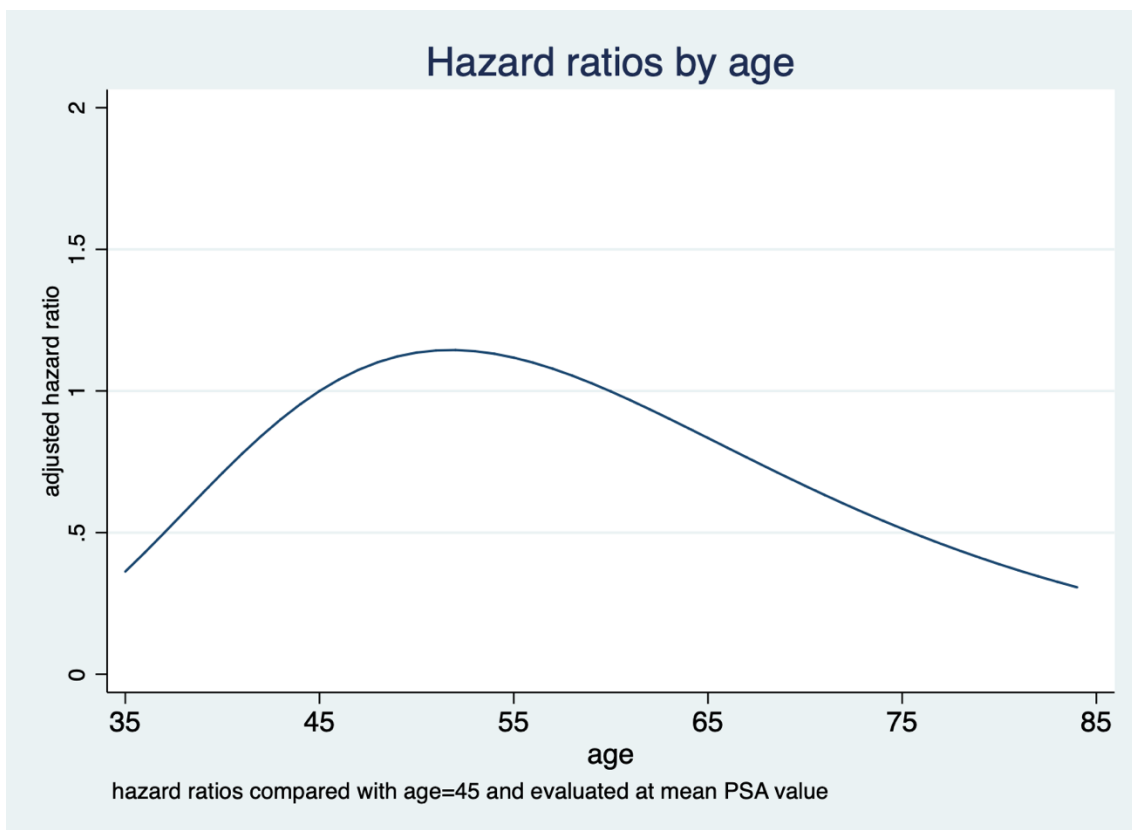

Supplementary Figure S1b Hazard ratios for the final model by family history by age

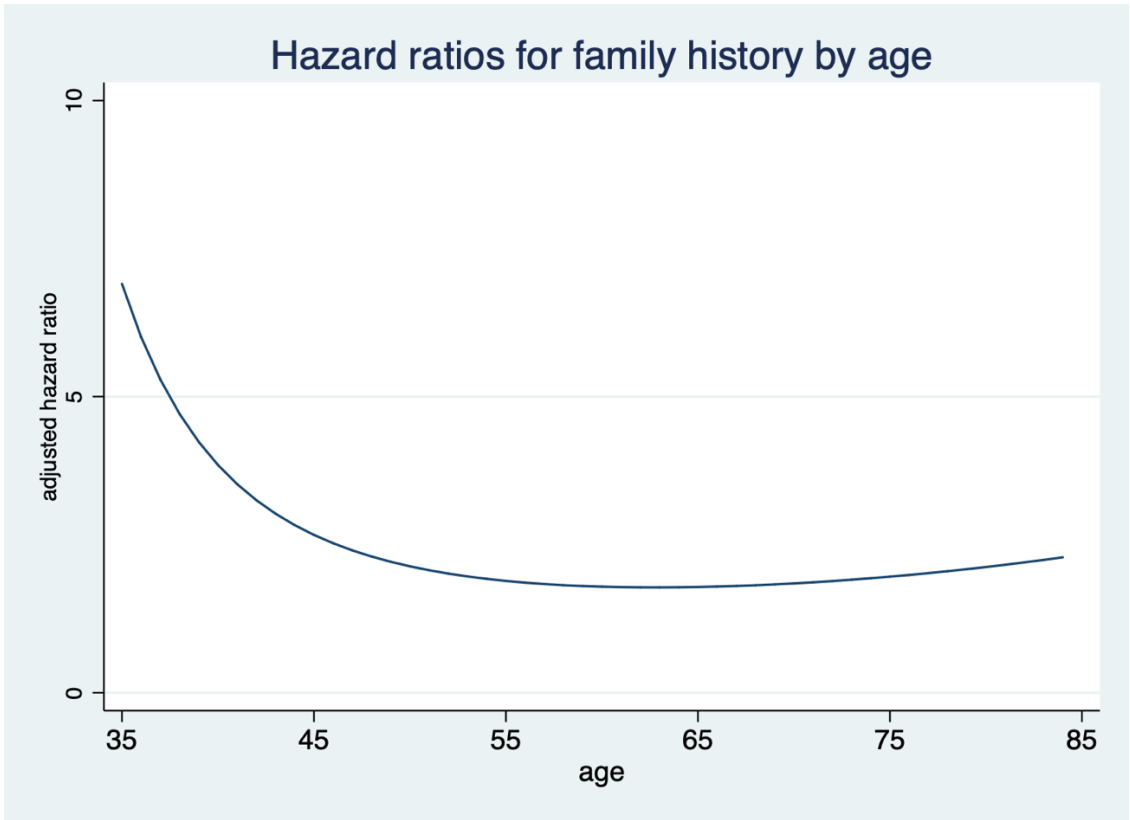

Supplementary Figure S1c Hazard ratios for the final model by PSA

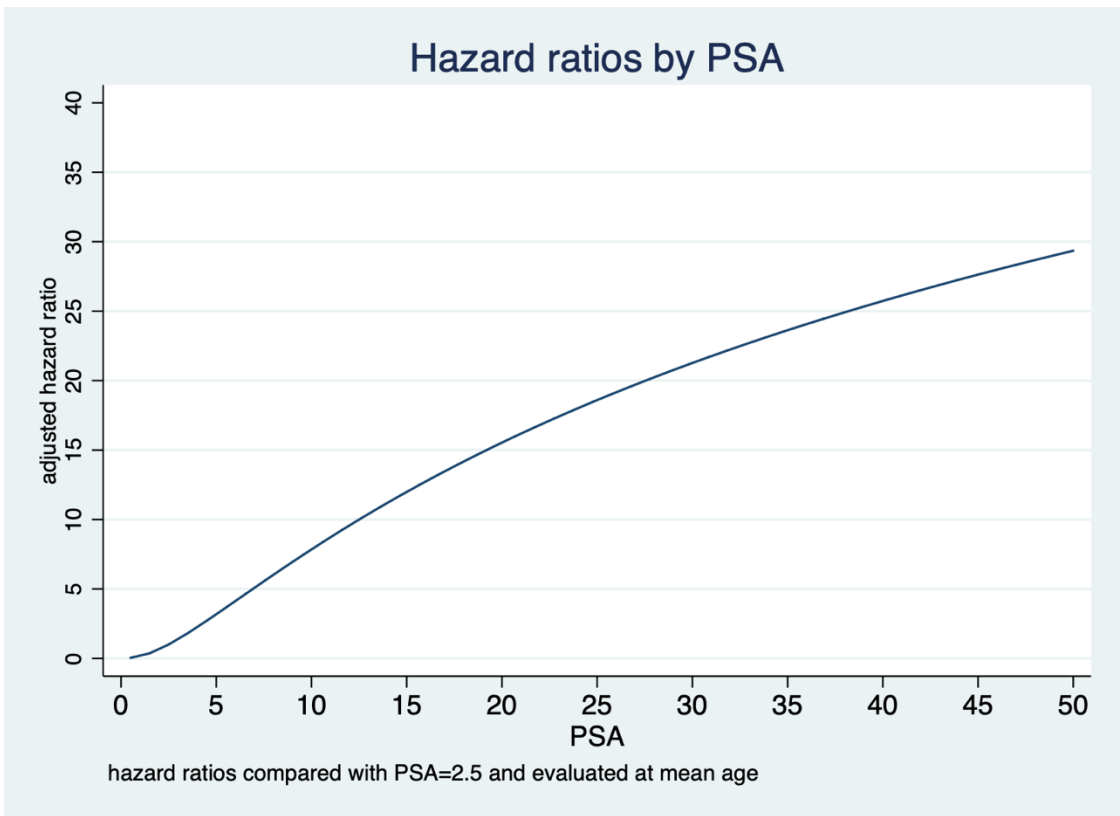

Supplementary Figure S1d Hazard ratios for the final model by age

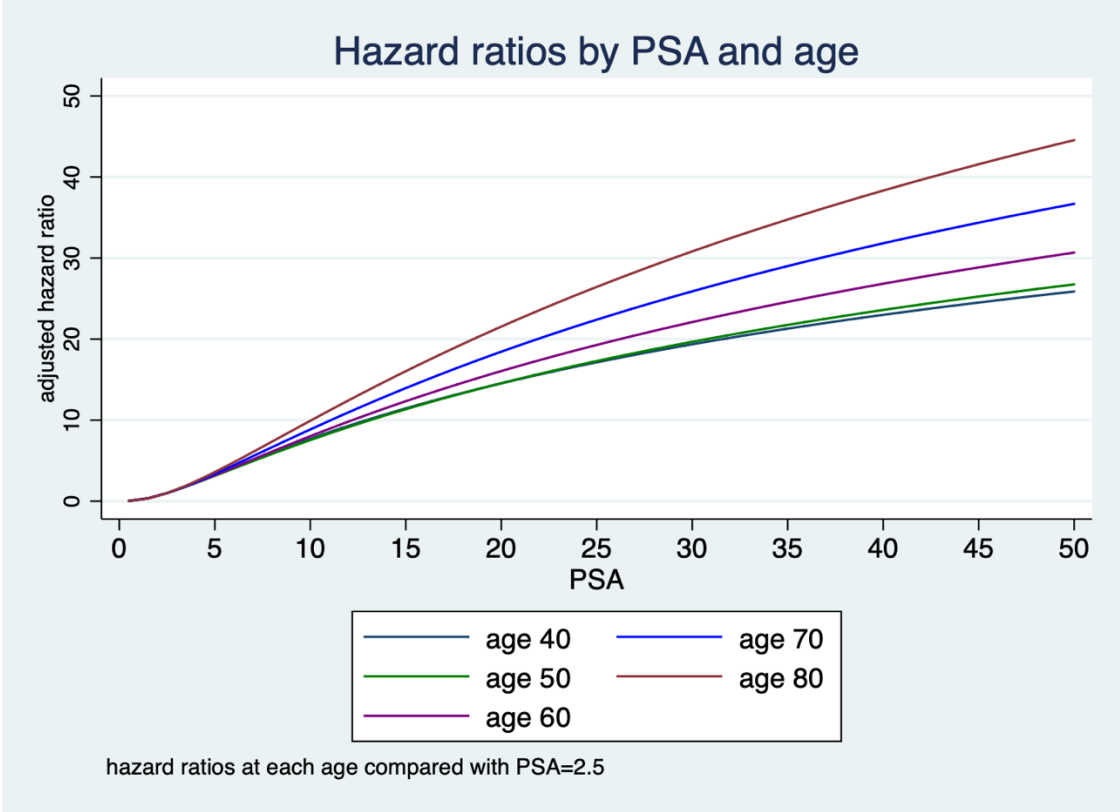

Supplementary Figure S1e Hazard ratios for the final model by body mass index

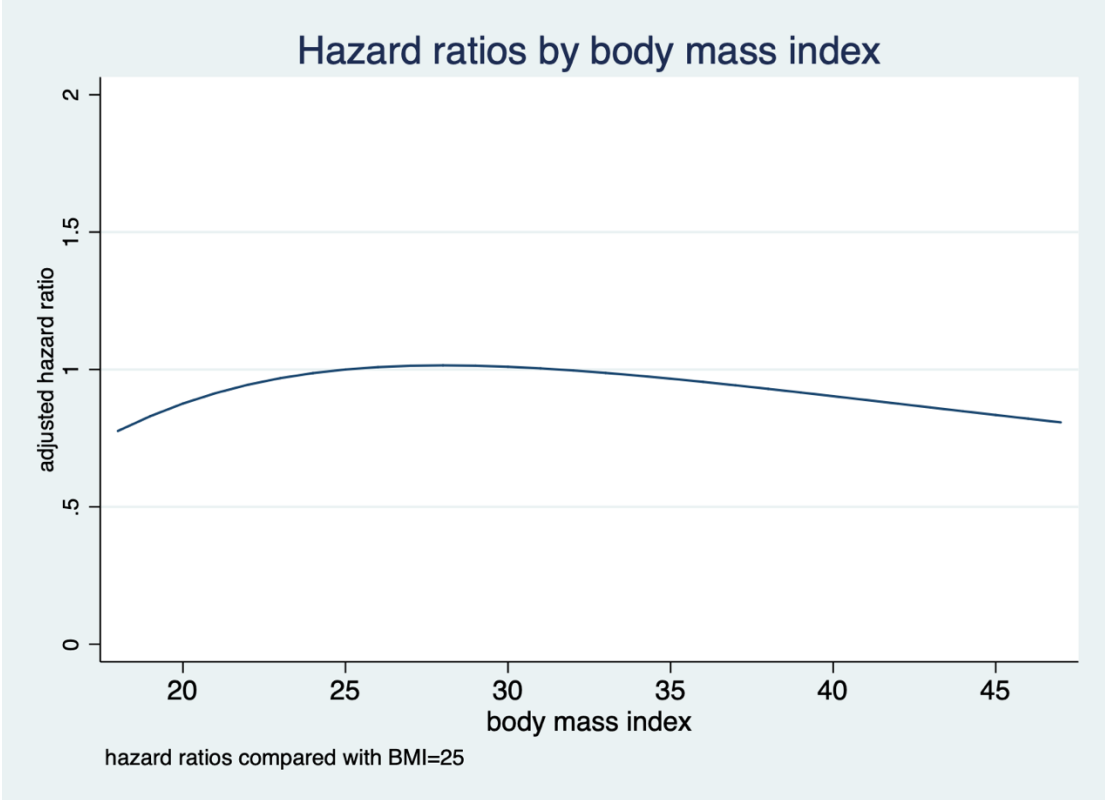

Supplementary Figure S2

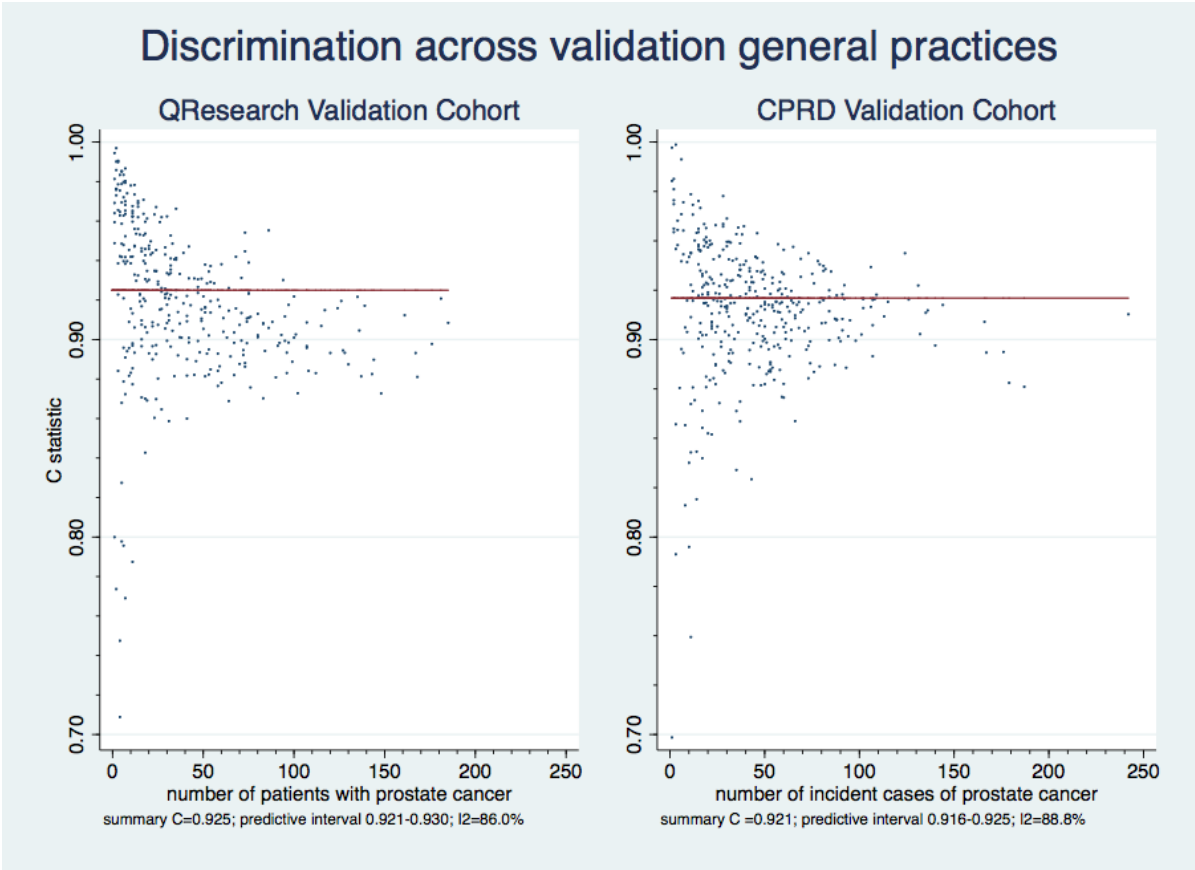

Supplementary Figure S3

### Predicted and observed 10 year risk (%) of prostate cancer

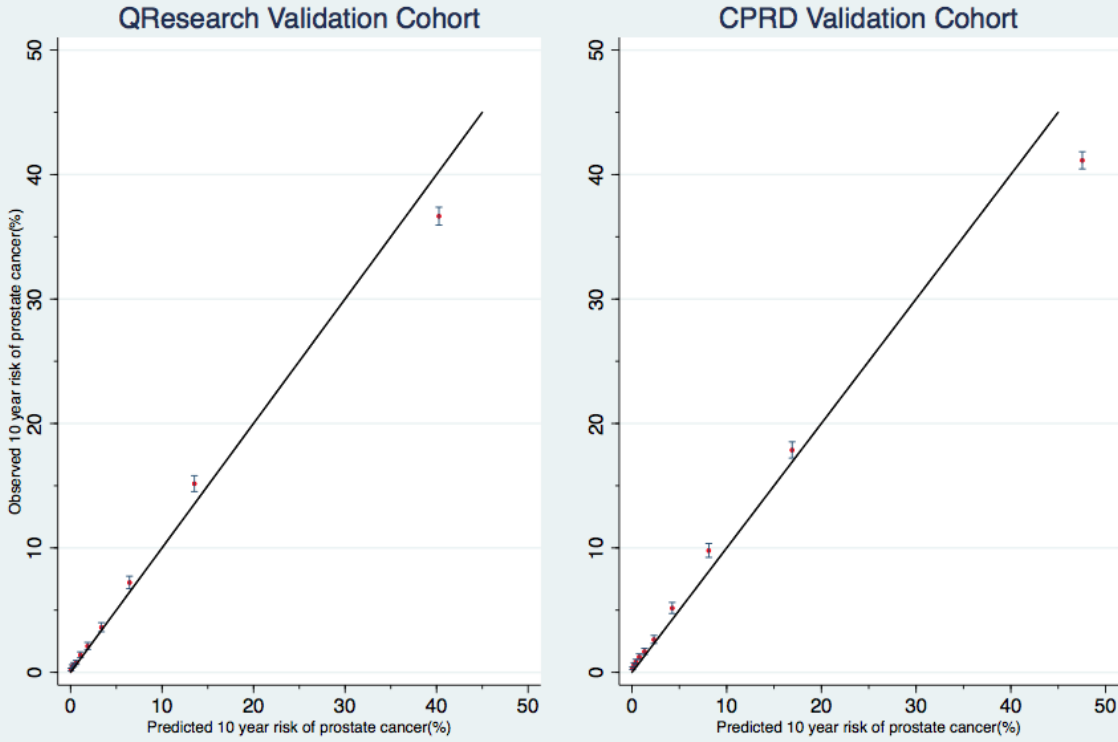

**Supplementary Table S2. Sensitivity, specificity and observed 10-year risk based on tenths of predicted 10-year risk of prostate cancer in the QResearch validation cohort. There were 12,886 cases of prostate cancer during 10 years follow-up from a cohort of 292,084 men.**

|                 | <b>Risk threshold (%)</b> | <b>True Negative</b> | <b>False Negative</b> | <b>False Positive</b> | <b>True Positive</b> | <b>Sensitivity (%)</b> | <b>Specificity (%)</b> | <b>Observed 10-year risk (95% CI)</b> |
|-----------------|---------------------------|----------------------|-----------------------|-----------------------|----------------------|------------------------|------------------------|---------------------------------------|
| top 10% of risk | 20.1                      | 258,426              | 4,450                 | 20,772                | 8,436                | 65.5                   | 92.6                   | 36.7 (35.9 to 37.4)                   |
| top 20% of risk | 9.0                       | 231,586              | 2,082                 | 47,612                | 10,804               | 83.8                   | 82.9                   | 25.9 (25.4 to 26.4)                   |
| top 30% of risk | 4.5                       | 203,297              | 1,162                 | 75,901                | 11,724               | 91.0                   | 72.8                   | 19.7 (19.3 to 20.0)                   |
| top 40% of risk | 2.5                       | 174,531              | 720                   | 104,667               | 12,166               | 94.4                   | 62.5                   | 15.6 (15.3 to 15.9)                   |
| top 50% of risk | 1.4                       | 145,579              | 463                   | 133,619               | 12,423               | 96.4                   | 52.1                   | 12.9 (12.7 to 13.2)                   |



## Supplementary Figure S4: Web calculator showing 10-year risk of developing prostate cancer in two clinical examples

This calculator is only valid if you do not already have a diagnosis of prostate cancer, and are free of the following symptoms: urinary retention, urinary frequency, nocturia, erectile dysfunction, haematuria and haematospermia.

Reset    Help/Support    Publications    About    Copyright    Register

### About you

Age (25-84):

Sex:  Male

Ethnicity:

UK postcode: leave blank if unknown  
Postcode:

### Clinical information

Smoking status:

Prostate specific antigen level (PSA) (ng/ml):

Do you have a family history of ...  
prostate cancer?

Do you currently have ...  
Diabetes:

Mental depression or schizophrenia?

Leave blank if unknown

Body mass index  
Height (cm):

Weight (kg):

Calculate risk over  years. [Data/Save risk](#)

Copyright © 2018-19 ClivRisk Ltd. ALL RIGHTS RESERVED.

Materials on this web site are protected by copyright law. Access to this website for the sole purpose of personal educational and research use only. Where appropriate a single print out of a reasonable proportion of these materials may be made for personal educational, research and private study. Materials should not be further copied, photocopied or reproduced, or distributed in electronic form. Any unauthorised use or distribution for commercial purposes is expressly prohibited. Any other unauthorised use or distribution of the materials may constitute an infringement of ClivRisk Ltd's copyright and may lead to legal action.

\*ClivRisk is a trademark of ClivRisk Ltd  
©2018 prostate algorithm © 2018-19 ClivRisk Ltd  
WebSite design © 2018-19 ClivRisk Ltd

### Your results

Your risk of having a diagnosis of prostate cancer within the next 10 years is 6.7%.

In other words, in a crowd of 100 people with the same risk factors as you, 7 are likely to have a diagnosis of prostate cancer within the next 10 years.

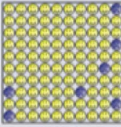

Risk of diagnosis of prostate cancer

Your score has been calculated using estimated data, as some information was left blank.

Your body mass index was calculated as 25.71 kg/m<sup>2</sup>.

---

### About you

Age (25-84):

Sex:  Male

Ethnicity:

UK postcode: leave blank if unknown  
Postcode:

### Clinical information

Smoking status:

Prostate specific antigen level (PSA) (ng/ml):

Do you have a family history of ...  
prostate cancer?

Do you currently have ...  
Diabetes:

Mental depression or schizophrenia?

Leave blank if unknown

Body mass index  
Height (cm):

Weight (kg):

Calculate risk over  years. [Calculate risk](#)

Copyright © 2018-19 ClivRisk Ltd. ALL RIGHTS RESERVED.

Materials on this web site are protected by copyright law. Access to this website for the sole purpose of personal educational and research use only. Where appropriate a single print out of a reasonable proportion of these materials may be made for personal educational, research and private study. Materials should not be further copied, photocopied or reproduced, or distributed in electronic form. Any unauthorised use or distribution for commercial purposes is expressly prohibited. Any other unauthorised use or distribution of the materials may constitute an infringement of ClivRisk Ltd's copyright and may lead to legal action.

\*ClivRisk is a trademark of ClivRisk Ltd  
©2018 prostate algorithm © 2018-19 ClivRisk Ltd  
WebSite design © 2018-19 ClivRisk Ltd

### Your results

Your risk of having a diagnosis of prostate cancer within the next 10 years is 39.2%.

In other words, in a crowd of 100 people with the same risk factors as you, 39 are likely to have a diagnosis of prostate cancer within the next 10 years.



Risk of diagnosis of prostate cancer

Your score has been calculated using estimated data, as some information was left blank.

Your body mass index was calculated as 25.71 kg/m<sup>2</sup>.
